# Supplementary material for: HACE1 deficiency causes an autosomal recessive neurodevelopmental syndrome
Source: HighWire-hosted journal article supplement (doi:10.1136/jmedgenet-2015-103344), 2015-09-30

## Supplementary Figures:

### Supplementary Figure 1

Autozygous intervals in patients 1–5 (left to right), defined using Affymetrix SNP 6 data and displayed using AutoSNPa [5]. The sixth column is data from an unaffected individual. Homozygous genotypes are black, heterozygous yellow.

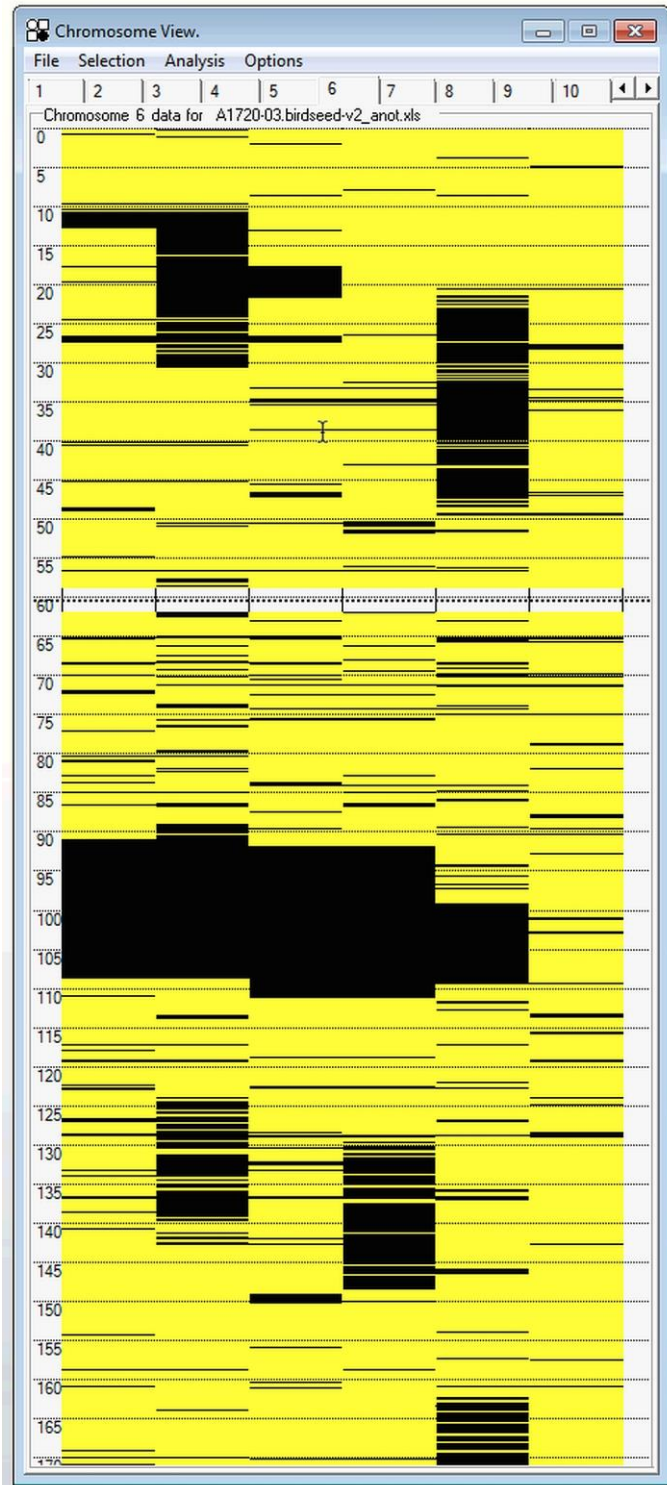

**Supplementary Figure 2**

Images of affected members of Family B.

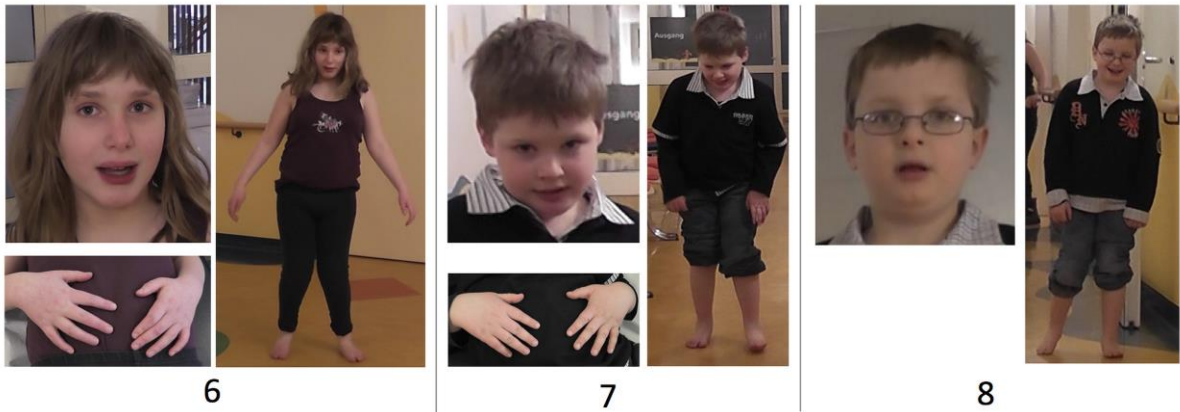

Supplement: jmedgenet-2015-103344supp_figures.pdf [file jmedgenet-2015-103344supp_figures.pdf]
