# Supplementary material for: HACE1 deficiency causes an autosomal recessive neurodevelopmental syndrome
Source: HighWire-hosted journal article supplement (doi:10.1136/jmedgenet-2015-103344), 2015-09-30
Supplement: jmedgenet-2015-103344supp_table.pdf [file jmedgenet-2015-103344supp_table.pdf]

| GENE    | HG19            | TRANSCRIPT | EFFECT     | VARIANT                                             |
|---------|-----------------|------------|------------|-----------------------------------------------------|
| LRRC7   | chr1:70505469   | uc001deq.3 | missense   | c.1571T>C; p.Leu524Ser                              |
| PHTF1   | chr1:114253004  | uc001edm.2 | missense   | c.412T>C; p.Met138Val                               |
| ENO4    | chr10:118638829 | uc021pzj.1 | missense   | c.565G>A; p.Ser522Asn                               |
| MYLK3   | chr16:46781792  | uc002eei.4 | missense   | c.314G>A; p.Ala105Val                               |
| ARRDC2  | chr19:18120840  | uc002nhu.3 | missense   | c.826G>A; p.Ala276Thr                               |
| OR5K2   | chr3:98217047   | uc011bgx   | missense   | c523A>G; p.Asn175Asp                                |
| C9      | chr5:39341717   | uc003jlv   | missense   | c.269G>A; p.Pro90Leu                                |
| CCDC152 | chr5:42759312   | uc003jmx   | splice     | NA                                                  |
| ZFYVE16 | chr5:79733396   | uc003kgs   | missense   | c.892A>G; p.Lys298Glu                               |
| KCNQ5   | chr6:73904824   | uc011dyk   | missense   | c.1736C>G; p.Ser579Cys                              |
| PHIP    | chr6:79752720   | uc003pir   | missense   | c.440G>A; p.Ala147Val                               |
| DOPEY1  | chr6:83839024   | uc010kbl   | missense   | c.2111G>A; p.Arg704Gln                              |
| CNR1    | chr6:88854123   | uc011dzt   | missense   | c.871C>G; p.Val291Leu                               |
| HACE1   | chr6:105198317  | uc003pqu   | nonsense   | c.2242G>A; p.Arg748*                                |
| HACE1   | chr6:105219260  | uc003pqu   | frameshift | c.2019_2020ins<br>TTTAGGTATTTTAGGTATT; p.P.674Ffs*5 |
| POLR3D  | chr8:22106736   | uc003xbl   | missense   | c.835C>G; p.Pro279Ala                               |
| CYHR1   | chr8:145690273  | uc003zcy   | missense   | c.12C>G; p.Lys4Asn                                  |
| POLR1E  | chr9:37486523-5 | uc003zzz   | indel      | c.86_88delCCT                                       |
| GCNT1   | chr9:79117513   | uc022bif   | frameshift | c.215_216insG                                       |
| ZNF484  | chr9:95610353   | uc004asv   | missense   | c.608A>G; p.Ile203Thr                               |
| FBP2    | chr9:97349648   | uc004auv.3 | missense   | c.274T>C; p.Thr92Ala                                |

### Supplementary Table S1

Exome data analysis of all three patients of family B; screen for shared homozygous or compound heterozygous non-synonymous variants. Known SNPs with “rs” numbers were excluded. *HACE1* mutations are shaded in grey.
